# Supplementary material for: Circulatory mechanisms underlying adaptive increases in thermogenic capacity in high-altitude deer mice
Source: Oxford University Press journal article supplement (doi:10.1242/jeb.164491), 2017-01-01
Supplement: jeb164491supp.pdf [file jeb164491supp.pdf]

**Table S1. Statistical results from linear models used to examine the effects of body mass, population altitude, and acclimation environment on VO<sub>2</sub>max and O<sub>2</sub> pulse**

| Source                  | df | F     | Probability > F |
|-------------------------|----|-------|-----------------|
| VO <sub>2</sub> max     |    |       |                 |
| Mass                    | 1  | 21.6  | <0.001          |
| Population altitude     | 1  | 4.22  | 0.048           |
| Acclimation environment | 1  | 27.8  | <0.001          |
| Altitude × acclimation  | 1  | 0.218 | 0.644           |
| Residual                | 35 |       |                 |
| O <sub>2</sub> pulse    |    |       |                 |
| Mass                    | 1  | 13.0  | 0.001           |
| Population altitude     | 1  | 3.87  | 0.059           |
| Acclimation environment | 1  | 12.2  | 0.002           |
| Altitude × acclimation  | 1  | 0.374 | 0.546           |
| Residual                | 29 |       |                 |

df, degrees of freedom; O<sub>2</sub> pulse, the amount of O<sub>2</sub> extracted from the blood per heartbeat (the quotient of VO<sub>2</sub> and f<sub>H</sub>); VO<sub>2</sub>max, maximal O<sub>2</sub> consumption measured during cold exposure in a hypoxic heliox atmosphere (12% O<sub>2</sub>, 88% He).

Body mass (Mb) and the variable of interest were log-transformed before making statistical comparisons, which were carried out using linear models (lm) in R (LogVariable ~ LogMb + Altitude + Acclimation + Altitude×Acclimation).
